# Supplementary material
Source: PubMed Central journal article supplement (PMC3378144)

Supportive Information

**Human colon cancer epithelial cells harbor active HEDGEHOG-GLI signaling  
that is essential for tumor growth, recurrence, metastasis  
and stem cell survival and expansion**

Frédéric Varnat<sup>1</sup>, Arnaud Duquet<sup>1</sup>, Monica Malerba<sup>1</sup>, Marie Zbinden<sup>1</sup>,  
Christophe Mas<sup>1</sup>, Pascal Gervaz<sup>2</sup> and Ariel Ruiz i Altaba<sup>1</sup>

University of Geneva Medical School

<sup>1</sup>Dept. Genetic Medicine and Development

1 rue Michel Servet

CH-1211 Geneva

<sup>2</sup>Dept of Surgery, Geneva University Hospital

24 rue Micheli-du-Crest

CH-1211 Geneva, Switzerland

## Supplementary Table and Figures

### Supplementary Table 1

List and medical data of all CC samples used in this study. Tumors are grouped by TNM stage.

### Supplementary Figure 1

Representative images of CC frozen sections obtained fresh from the operating room stained with anti-CARCINOEMBRYONIC antigen or Pan-CYTOKERATIN antibodies (A) or with anti- $\beta$ CATENIN (B) antibodies. In (A) nuclei are stained with DAPI and are shown in blue whereas specific staining is shown in red. Immunolabelings in (B) were developed with HRP-coupled antibodies and DAB. The same tumors (e.g. mCC1) often had regions of mostly nuclear (arrows) or mostly nucleocytoplasmic labeling. Other tumors had mostly membrane labeling (CC7). mCC11 had only nuclear labeling. There was no correlation between the pattern of labeling and response to HH-GLI inhibition. Scale bar = 40  $\mu$ m.

### Supplementary Figure 2

Heat map with numerical values corresponding to Fig 2A. Values are ratios of relative expression levels in CD133<sup>+</sup> over those in CD133<sup>-</sup> populations after normalization with housekeeping genes.

### Supplementary Figure 3

A) Effects of two independent sets of siRNAs specific for each *GLI* mRNA on HT29 CC cells measuring proliferation by the BrdU index and apoptosis by the activated Caspase 3 index. Proliferation is measured by the phospho-Histone H3 (P-Histone3) labeling index (number of P-Histone3<sup>+</sup> cells over the total number of cells labeled by DAPI; top left) or by BrdU incorporation (top right). Apoptosis was measured by the activated Caspase3 index (number of activated Caspase3<sup>+</sup> cells over total number of DAPI<sup>+</sup> cells; bottom). Asterisks here and in all panels denote significant changes ( $p < 0.05$ ).

B) Histogram of the pro-proliferative effect of shPTCH1 lentivirus on transduced HT29 cells, shown as an increase in the BrdU index.

C) Rescue of the anti-proliferative effects of cyclopamine (cyc) by GLI1 as compared with tomatidine (tom) in HT29 cells transfected with GFP-expressing plasmids or

GFP- plus GLI1-expressing plasmids. The values are given as the fraction of proliferating (BrdU<sup>+</sup>) cells that were also GFP<sup>+</sup> and equating this ratio to 1 in the control tomatidine in both conditions.

#### **Supplementary Figure 4**

A) Histograms of the effects of the concentration-dependent effects of cyclopamine (cyc) of Caco2 CC cells in vitro as compared with tomatidine (tom) as control.

Numbers refer to concentrations in  $\mu\text{M}$ .

B) Anti-proliferative (left) and pro-apoptotic (right) effects of cyclopamine on HT29 CC cells.

C) Representative example of the anti-proliferative effects of 10 $\mu\text{M}$  cyclopamine (cyc) treatment vs. treatment with 10 $\mu\text{M}$  tomatidine (tom) in HT29 cells. Incorporated BrdU in cells that divided during the treatment period before fixation are revealed by indirect immunofluorescence (red).

D) Representative example of increased apoptosis by siRNA against *GLI1* (siGLI1) as compared with a control siRNA (siC). Apoptotic cells express activated Caspase 3 protein shown by indirect immunofluorescence (green).

Scale bar = 150 $\mu\text{m}$  (C,D).

| Sample | Location         | TNM     | Stage | Gender | Age | Treatment |
|--------|------------------|---------|-------|--------|-----|-----------|
| CC21   | Colon L          | T2N0M0  | 1     | F      | 84  |           |
| CC34   | Rectum           | Adenoma | 1     | M      | 46  |           |
| CC2    | Colon R          | T4N0M0  | 2     | M      | 62  |           |
| CC6    | Colon R          | T3N0M0  | 2     | M      | 62  |           |
| CC7    | Colon R          | T3N0M0  | 2     | F      | 85  |           |
| CC11   | Colon L          | T3N0M0  | 2     | M      | 67  |           |
| CC16   | Colon L          | T3N0M0  | 2     | M      | 67  |           |
| CC24   | Colon R          | T3N0M0  | 2     | M      | 68  |           |
| CC28   | Colon R          | T3N0M0  | 2     | M      | 87  |           |
| CC32   | Colon R          | T3N0M0  | 2     | M      | 88  |           |
| CC33   | Rectum           | T3N0M0  | 2     | F      | 66  |           |
| CC3    | Colon L          | T3N2M0  | 3     | M      | 49  |           |
| CC5    | Colon L          | T2N1M0  | 3     | M      | 83  |           |
| CC8    | Colon L          | T4N1M0  | 3     | F      | 58  |           |
| CC13   | Rectum           | T4N1M0  | 3     | M      | 77  |           |
| CC15   | Colon L          | T4N1M0  | 3     | M      | 69  |           |
| CC20   | Colon L          | T4N1M0  | 3     | M      | 75  |           |
| CC29   | Colon L          | T4N1M0  | 3     | M      | 62  |           |
| CC30   | Colon L          | T3N1M0  | 3     | M      | 85  |           |
| CC36   | Colon L          | T3N2M0  | 3     | F      | 57  |           |
| CC4    | Colon R          | T4N2M1  | 4     | M      | 53  |           |
| CC9    | Colon L          | T3N0M1  | 4     | F      | 54  | CF-AVA    |
| CC10   | Rectum           | T3N2M1  | 4     | F      | 74  |           |
| CC14   | Colon L          | T4N2M1  | 4     | F      | 73  |           |
| CC18   | Colon L          | T3N2M1  | 4     | M      | 73  |           |
| CC19   | Colon R          | na      | 4     | F      | 81  |           |
| CC23   | Colon L          | T4N2M1  | 4     | M      | 57  |           |
| CC25   | Colon R          | T4N2M1  | 4     | F      | 82  |           |
| CC31   | Colon R          | T4N2M1  | 4     | M      | 64  |           |
| mCC1   | Liver Metastasis | T0N1M1  | 4     | F      | 66  | OCFL      |
| mCC2   | Liver Metastasis | T3N2M1  | 4     | M      | 64  | OCFL-AVA  |
| mCC3   | Liver Metastasis | T3N1M1  | 4     | F      | 49  | OCFL      |
| mCC4   | Liver Metastasis | T4N2M1  | 4     | M      | 61  | OCFL      |
| mCC6   | Liver Metastasis | T3N1M1  | 4     | F      | 65  | OCFL-AVA  |
| mCC7   | Liver Metastasis | T3N1M1  | 4     | F      | 75  |           |
| mCC8   | Liver Metastasis | T3N0M1  | 4     | F      | 75  |           |
| mCC9   | Liver Metastasis | T4N2M1  | 4     | F      | 73  |           |
| mCC11  | Liver Metastasis | T3N0M1  | 4     | M      | 84  |           |
| mCC17  | Liver Metastasis | T4N0M1  | 4     | F      | 76  | OCFL-AVA  |
| mCC19  | Liver Metastasis | T4N2M1  | 4     | M      | 64  |           |

  

|          |           |                   |
|----------|-----------|-------------------|
| L= left  | F= female | O= Oxaliplatin    |
| R= right | M= male   | C= Irinotecan     |
|          | deceased  | F= 5-Fluorouracil |
|          |           | L= Leucovorin     |
|          |           | AVA= Avastin      |

Supplementary Table 1 Varnat et al.

**A**

Carcinoembryonic antigen / DAPI

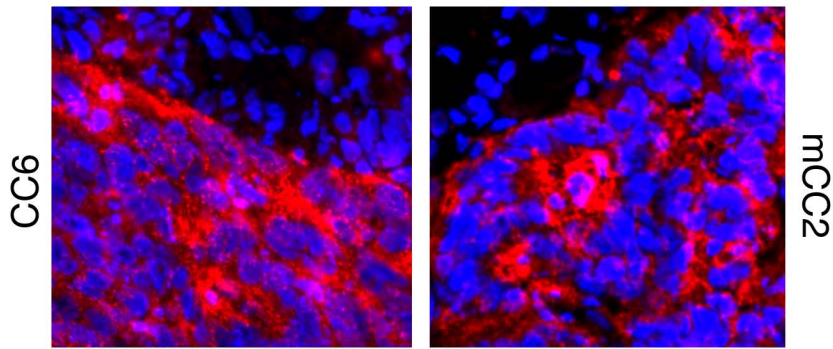

CEA/ DAPI

Cytokeratin/ DAPI

CEA/ DAPI

Cytokeratin/ DAPI

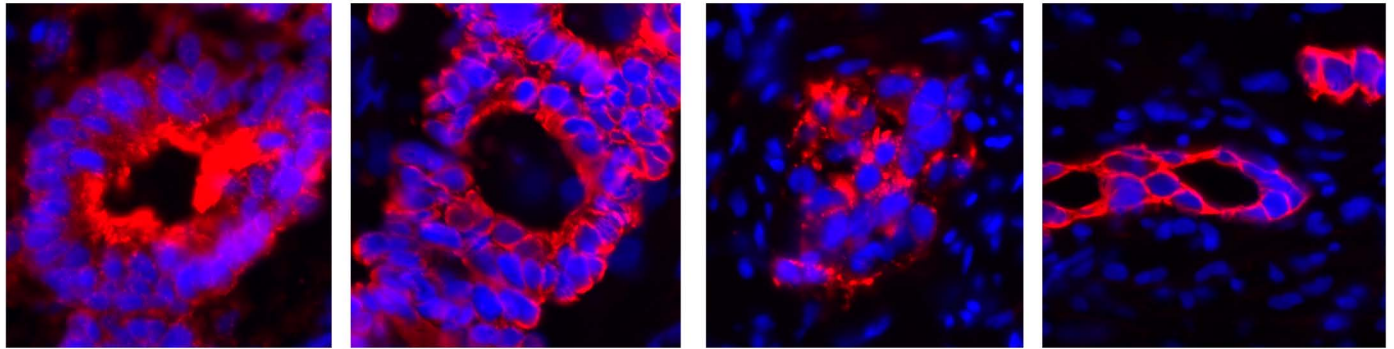**B** $\beta$  CATENIN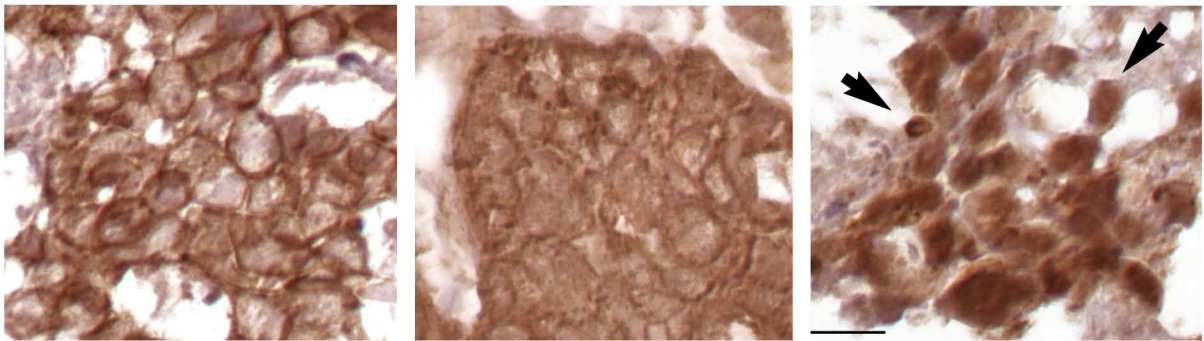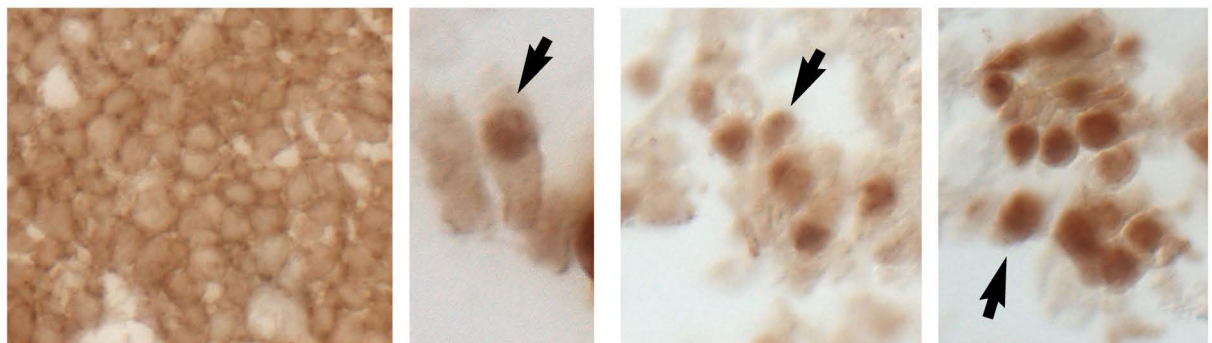

|                      | Normal Colon |       | Colon Cancer Without Metastases |     |       |     | Colon Cancer With Metastases |     |              |     | Liver Metastases        |     | Normal Liver |     | Subcutaneous Xenografts |     |     |     |     |     |     |     |     |     |     |     |     |     |     |     |     |
|----------------------|--------------|-------|---------------------------------|-----|-------|-----|------------------------------|-----|--------------|-----|-------------------------|-----|--------------|-----|-------------------------|-----|-----|-----|-----|-----|-----|-----|-----|-----|-----|-----|-----|-----|-----|-----|-----|
|                      | TNM 1        | TNM 2 | TNM 3                           |     | TNM 4 |     | Liver Metastases             |     | Normal Liver |     | Subcutaneous Xenografts |     |              |     |                         |     |     |     |     |     |     |     |     |     |     |     |     |     |     |     |     |
| <i>GLI1</i>          | 1.6          | 0.9   | 1.5                             | 0.9 | 1     | 0.5 | 1.6                          | 1.9 | 2.2          | 2.6 | 2                       | 2.6 | 2.7          | 3   | 4.2                     | 2.4 | 2.4 | 3.1 | 3.3 | 3.3 | 5.2 | 6.6 | 8.9 | 1.4 | 1.5 | 2.2 | 2.8 | 4.1 | 3.1 | 3.4 |     |
| <i>HIP</i>           | 1.4          | 1     | 1.4                             | 0.7 | 0.6   | 0.6 | 0.4                          | 0.9 | 0.4          | 0.3 | 3.5                     | 5.2 | 3.2          | 4.6 | 6.3                     | 4.1 | 5.1 | 2.9 | 3.5 | 3.4 | 2.2 | 3.9 | 7.7 | 0.9 | 1.5 | 5   | 4.9 | 3.7 | 4.6 | 2.2 |     |
| <i>GLI2</i>          | 1.2          | 1     | 1.2                             | 0.6 | 0.5   | 0.1 | 0.4                          | 0.6 | 0.2          | 0.3 | 3.9                     | 5.5 | 12.8         | 4.2 | 9.9                     | 3.6 | 1.7 | 5.2 | 3   | 7.9 | 2.1 | 3.2 | 2.9 | 1.1 | 0.9 | 6   | 4.6 | 5.9 | 7.3 | 8.8 |     |
| <i>SHH</i>           | 1.1          | 1.1   | 1.2                             | 1   | 1.1   | 1.1 | 2.4                          | 1.6 | 5.5          | 1.8 | 3.1                     | 1.9 | 1            | 2   | 1.9                     | 0.9 | 3.6 | 2.2 | 1.9 | 2.8 | 0.7 | 1.3 | 3.1 | 0.9 | 1.1 | 0.6 | 1.2 | 1.3 | 0.9 | 0.4 |     |
| <i>SNAIL1</i>        | 1.2          | 1.2   | 0.9                             | 1   | 1.2   | 0.7 | 0.9                          | 0.8 | 5.1          | 3.1 | 1.1                     | 1   | 1.2          | 0.8 | 0.9                     | 1.4 | 1.4 | 1   | 1   | 0.9 | 1.9 | 2.1 | 3.2 | 1.2 | 1.3 | 3.2 | 2.2 | 1.4 | 1.4 | 2.5 | 2.4 |
| <i>PTCH1</i>         | 1.7          | 1.1   | 0.7                             | 1.1 | 0.6   | 1.4 | 1.8                          | 1.4 | 2.4          | 1.9 | 1.6                     | 1   | 1.3          | 1.1 | 0.9                     | 0.8 | 1.8 | 1.1 | 0.9 | 1.1 | 0.8 | 1   | 1.9 | 1   | 1.4 | 1   | 1.6 | 1.9 | 3.4 | 1   |     |
| <i>IHH</i>           | 1            | 0.8   | 1                               | 0.6 | 1.4   | 1.2 | 1.6                          | 1.3 | 2.9          | 2.1 | 1                       | 1.3 | 0.8          | 0.9 | 1                       | 1.2 | 1.2 | 0.9 | 0.8 | 1.1 | 0.8 | 0.9 | 1   | 1.4 | 1.2 | 0.8 | 0.8 | 0.9 | 1   | 2.5 |     |
| <i>SUFUH</i>         | 1.1          | 1.1   | 0.9                             | 1.2 | 1.2   | 1.9 | 1.3                          | 2.2 | 1            | 1.3 | 0.9                     | 1   | 1            | 1   | 1.2                     | 0.8 | 0.9 | 1.1 | 0.9 | 1.1 | 0.8 | 0.9 | 1   | 0.8 | 1.1 | 0.9 | 0.9 | 1.2 | 0.6 | 1.2 |     |
| <i>GLI3</i>          | 0.8          | 0.7   | 0.9                             | 0.8 | 0.7   | 0.6 | 0.6                          | 1   | 0.3          | 0.4 | 0.9                     | 1.3 | 1.2          | 3.6 | 0.9                     | 1.1 | 2.2 | 0.9 | 1.1 | 0.9 | 1.2 | 2.7 | 1.3 | 1   | 0.9 | 1   | 1.1 | 0.8 | 1.2 | 1.4 |     |
| <i>CD133</i>         | 3.9          | 6.1   | 5.2                             | 6.1 | 5.4   | 4.4 | 6.2                          | 5.1 | 4.1          | 4.6 | 4.5                     | 6.2 | 3.9          | 3.7 | 7.4                     | 5.9 | 5.9 | 4.9 | 3.1 | 5.3 | 5.5 | 4.6 | 6.1 | 3.9 | 5.1 | 4.7 | 5.5 | 3.7 | 4.3 | 4   |     |
| CC sample            | C1           | C2    | C3                              | 34  | 21    | 24  | 16                           | 32  | 28           | 33  | 20                      | 15  | 36           | 29  | 30                      | 31  | 14  | 23  | 25  | m9  | m8  | m11 | m19 | L1  | L2  | Ls  | HT  | 14  | m11 | m17 |     |
| % CD133 <sup>+</sup> | 1.3          | 1.4   | 1.8                             | 8.8 | 9.3   | 14  | 11                           | 9.5 | 18           | 12  | 15                      | 9   | 14           | 25  | 18                      | 12  | 16  | 20  | 21  | 6   | 27  | 11  | 26  | 0.8 | 1.9 | 27  | 39  | 21  | 24  | 21  |     |

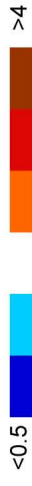

Suppl Fig. 2 Varnat et al.

**A**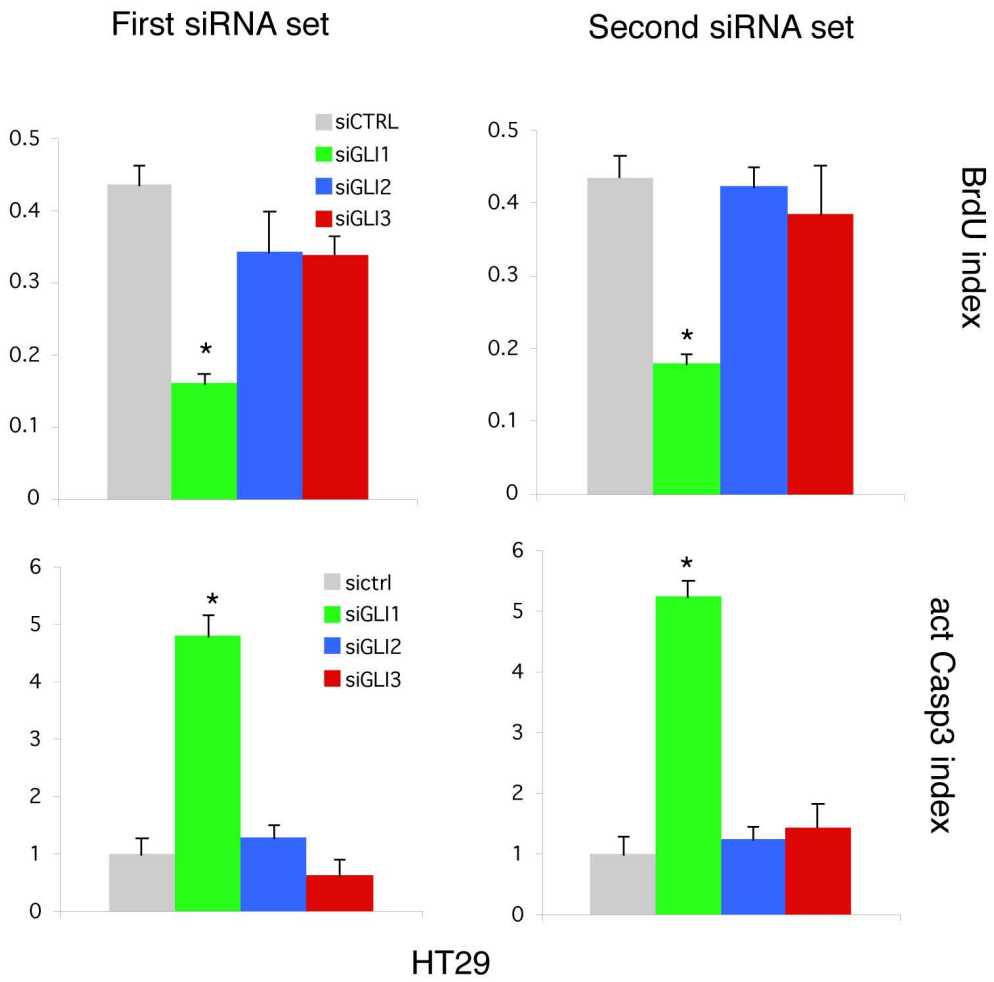

HT29

Lentivectors

**B**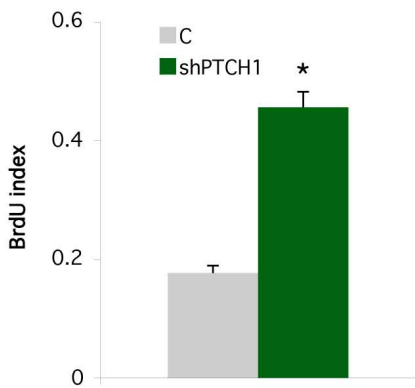

HT29

**C**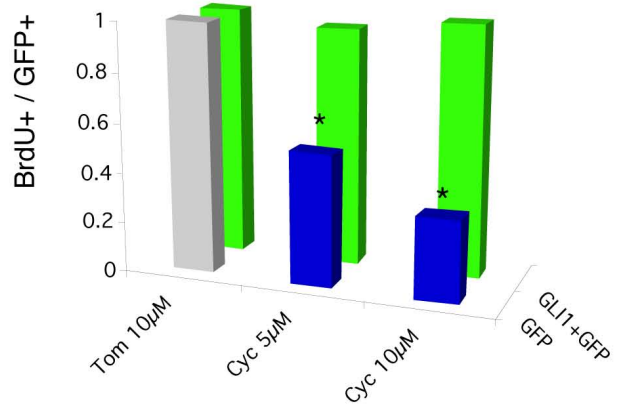

**A****Caco2**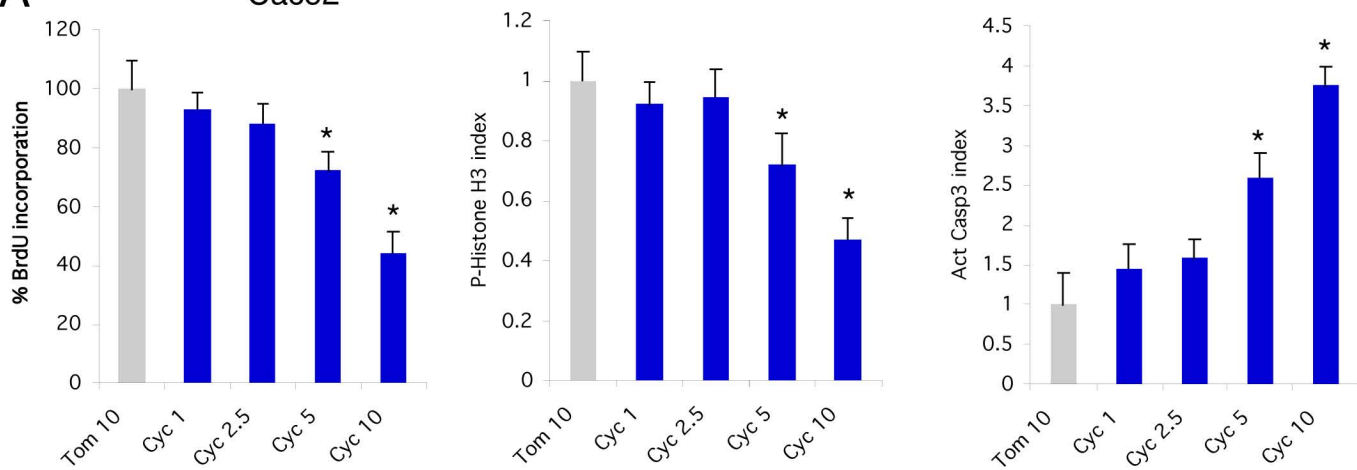**B****HT29**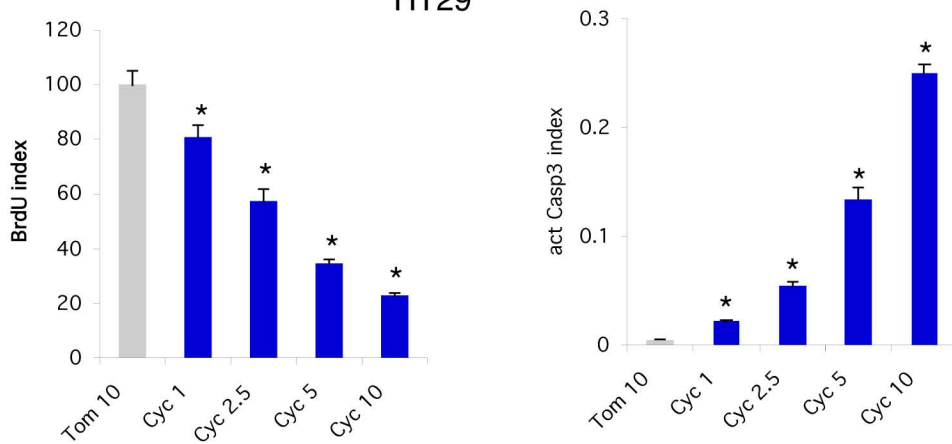**C****tom****cyc****BrdU/DAPI**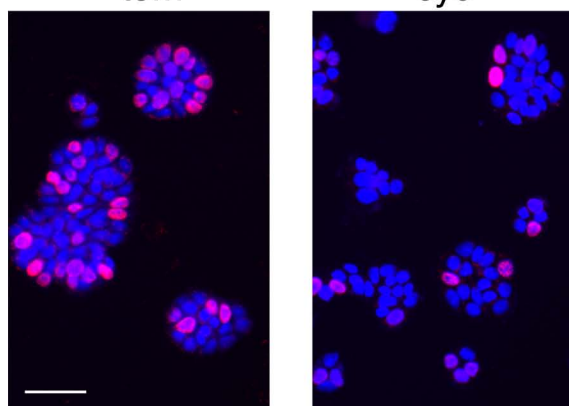**D****siC****siGLI1****Activated Caspase 3/DAPI**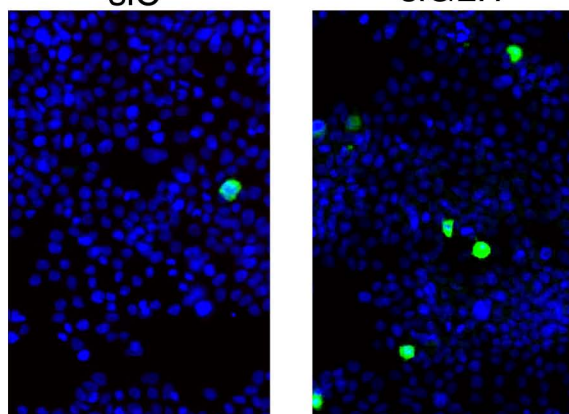

Supplement: emmm0001-0338-SD1.pdf [file emmm0001-0338-SD1.pdf]
